# Supplementary material for: Ubiquitous Promoter-Localization of Essential Virulence Regulators in Francisella tularensis
Source: PLoS Pathog. 2015 Apr 1;11(4):e1004793. doi: 10.1371/journal.ppat.1004793 (PMC4382096; doi:10.1371/journal.ppat.1004793)
Supplement: S5 Table — There are 581 promoter regions reported (P1-P581), which were identified by ChIP-Seq of one or more factors (β′+rif, σ70, and σ32). Promoters are listed multiple times if more than one transcription factor and ChIP-Seq peak was used to define the promoter. The nucleotide location on the genome is reported for each promoter location (“Start” and “End”). The factors used to define each promoter are indicated (“Factor used to define promoter”): βʹ+rif (“Betaprime+rif”), σ70 (“Sigma70”), or σ32 (“Sigma32”). *Each factor listed refers to a particular ChIP-Seq peak for the given factor within the defined promoter region. Factors may be listed more than once for a particular promoter if multiple ChIP-Seq peaks are included in one promoter region. **Nucleotide position of maximal enrichment of ChIP-Seq peak for indicated factor. ***Genes are considered to be associated if the translation start site is within 100 bp upstream to 500 bp downstream of the position of maximal enrichment. (XLSX) [file ppat.1004793.s007.xlsx]

## Sheet: S5_Table.xlsx
Promoter Number	Start	End	Factor used to define promoter*	Location of maximal enrichment of indicated factor**	Associated gene loci***
P1	1	340	Betaprime+rif	127	FTL_0001
P2	7943	8339	Betaprime+rif	8143	FTL_0009
P2	7943	8339	Sigma70	8117	FTL_0009
P3	8601	9046	Betaprime+rif	8857	FTL_0010 FTL_0011
P4	10749	11652	Betaprime+rif	11495	FTL_0014
P4	10749	11652	Sigma70	11392	FTL_0014
P5	11846	12189	Betaprime+rif	12025	FTL_0015
P6	19095	19715	Betaprime+rif	19499	FTL_0020
P6	19095	19715	Sigma70	19400	FTL_0020
P7	23026	23371	Betaprime+rif	23236	FTL_R0001
P8	24171	24810	Betaprime+rif	24636	FTL_0024
P8	24171	24810	Sigma70	24442	FTL_0024
P9	24927	25624	Betaprime+rif	25420	FTL_0025 FTL_0026 FTL_0027
P9	24927	25624	Sigma70	25432	FTL_0025 FTL_0026 FTL_0027
P10	31790	32440	Sigma70	32058	FTL_0030 FTL_0031
P11	34106	34393	Betaprime+rif	34273	FTL_0032 FTL_0033
P12	35696	37037	Betaprime+rif	36726	FTL_0034
P12	35696	37037	Sigma70	36751	FTL_0034 FTL_0035
P13	39469	39779	Betaprime+rif	39665	FTL_0037
P14	40648	41419	Betaprime+rif	41127	FTL_0039 FTL_0040
P14	40648	41419	Sigma70	41076	FTL_0038 FTL_0039 FTL_0040
P15	43390	43683	Betaprime+rif	43548	FTL_0042 FTL_0043
P16	47557	48047	Betaprime+rif	47699	FTL_0044 FTL_0045
P17	55913	56291	Betaprime+rif	56095	FTL_0055
P17	55913	56291	Sigma70	56081	FTL_0055
P18	56789	57163	Sigma70	57016	FTL_0056 FTL_0057
P19	58961	59378	Betaprime+rif	59166	FTL_0058 FTL_0059
P19	58961	59378	Sigma70	59148	FTL_0058 FTL_0059
P20	60862	61193	Betaprime+rif	61052
P21	61320	61725	Betaprime+rif	61518	FTL_0061
P22	65927	66392	Betaprime+rif	66175	FTL_0067 FTL_0068
P22	65927	66392	Sigma70	66221	FTL_0067 FTL_0068
P23	67250	68018	Betaprime+rif	67753	FTL_0070 FTL_0071
P23	67250	68018	Sigma70	67536	FTL_0070 FTL_0071
P24	75916	76022	Sigma70	75981	FTL_0078 FTL_R0002
P25	76710	76817	Betaprime+rif	76756	FTL_0079
P26	78627	79114	Betaprime+rif	78844	FTL_0081
P27	79944	80256	Betaprime+rif	80168	FTL_0084 FTL_0085
P28	81142	81475	Betaprime+rif	81269	FTL_0086
P29	83929	84499	Betaprime+rif	84254	FTL_0089 FTL_0090
P29	83929	84499	Sigma70	84153	FTL_0089 FTL_0090
P30	91781	92199	Betaprime+rif	91943	FTL_0094 FTL_0095 FTL_0096
P30	91781	92199	Sigma70	92087	FTL_0094 FTL_0095 FTL_0096
P31	92547	92985	Betaprime+rif	92811	FTL_0097
P32	95190	95458	Betaprime+rif	95268	FTL_0099
P33	98275	98474	Betaprime+rif	98357	FTL_0101 FTL_0102
P34	99397	99768	Betaprime+rif	99686	FTL_0105 FTL_0106
P34	99397	99768	Sigma70	99657	FTL_0105 FTL_0106
P35	102224	103010	Betaprime+rif	102812	FTL_0111
P35	102224	103010	Sigma70	102521	FTL_0108 FTL_0110 FTL_0111
P36	107451	107572	Betaprime+rif	107510	FTL_0115
P37	108215	108731	Betaprime+rif	108637
P38	112694	113082	Betaprime+rif	112926
P39	124134	124731	Betaprime+rif	124333	FTL_0126 FTL_R0003
P39	124134	124731	Sigma70	124454	FTL_0126 FTL_R0003
P40	129578	129943	Betaprime+rif	129763	FTL_0127
P41	133884	134331	Betaprime+rif	134059	FTL_0131
P41	133884	134331	Sigma70	134114	FTL_0131
P42	136751	137705	Betaprime+rif	137071	FTL_0132
P42	136751	137705	Betaprime+rif	137469
P42	136751	137705	Sigma70	137382
P43	139795	140181	Betaprime+rif	140080	FTL_0133
P44	141785	143325	Betaprime+rif	142845	FTL_0136
P44	141785	143325	Betaprime+rif	141944
P44	141785	143325	Sigma70	142617	FTL_0136
P45	143760	144356	Betaprime+rif	143907	FTL_0138
P46	148688	149030	Betaprime+rif	148775	FTL_0143
P47	149557	149930	Betaprime+rif	149734	FTL_0144 FTL_0145
P47	149557	149930	Sigma70	149674	FTL_0144 FTL_0145
P48	152854	153187	Betaprime+rif	153057	FTL_0147
P49	153316	153691	Betaprime+rif	153476
P49	153316	153691	Sigma70	153436
P50	158225	158924	Betaprime+rif	158524	FTL_R0008 FTL_0152
P50	158225	158924	Sigma70	158528	FTL_R0008 FTL_0152
P51	162130	162950	Betaprime+rif	162461	FTL_0157 FTL_0158
P51	162130	162950	Sigma70	162472	FTL_0157 FTL_0158
P52	166015	166475	Betaprime+rif	166252	FTL_0161
P53	168414	168729	Betaprime+rif	168480	FTL_0164 FTL_0165
P54	169342	169766	Betaprime+rif	169540	FTL_0166
P54	169342	169766	Sigma70	169615	FTL_0166
P55	172934	173302	Betaprime+rif	173078	FTL_0168
P56	176614	176994	Betaprime+rif	176790	FTL_0172
P57	177461	177829	Betaprime+rif	177639	FTL_0173 FTL_0174
P57	177461	177829	Sigma70	177613	FTL_0173 FTL_0174
P58	178021	178592	Betaprime+rif	178176	FTL_0175 FTL_0176
P58	178021	178592	Sigma70	178308	FTL_0175 FTL_0176 FTL_0177
P59	178608	179127	Sigma70	178883	FTL_0178
P60	181243	181986	Betaprime+rif	181591	FTL_0180
P60	181243	181986	Sigma70	181644	FTL_0180
P61	190202	190693	Betaprime+rif	190467	FTL_0189
P61	190202	190693	Sigma70	190452	FTL_0189
P62	192182	192568	Betaprime+rif	192429	FTL_0190 FTL_0191
P62	192182	192568	Sigma70	192455	FTL_0190 FTL_0191
P63	199045	199336	Sigma70	199161	FTL_0197
P64	207095	207417	Betaprime+rif	207241	FTL_0207
P65	213656	213968	Betaprime+rif	213758	FTL_0213
P66	222834	223601	Betaprime+rif	223150	FTL_R0009
P66	222834	223601	Sigma70	223318	FTL_R0009
P67	224259	224597	Betaprime+rif	224424	FTL_0222
P68	224793	225275	Betaprime+rif	225063	FTL_0223 FTL_0224
P68	224793	225275	Sigma70	225049	FTL_0223 FTL_0224
P69	230657	231073	Betaprime+rif	230870	FTL_0232 FTL_0233
P69	230657	231073	Sigma70	230799	FTL_0232
P70	247709	247990	Betaprime+rif	247909	FTL_0263
P71	248601	250222	Betaprime+rif	249533	FTL_0264 FTL_0265
P71	248601	250222	Sigma70	249145	FTL_0264 FTL_0265
P72	254736	255024	Betaprime+rif	254828	FTL_0268
P73	261052	261503	Betaprime+rif	261262	FTL_0274
P74	265781	266261	Betaprime+rif	266009	FTL_0280 FTL_0281
P74	265781	266261	Sigma32	266026	FTL_0280 FTL_0281
P75	267838	268196	Sigma70	268005	FTL_0282 FTL_0283
P76	271798	272167	Betaprime+rif	272012
P77	272590	272916	Betaprime+rif	272758	FTL_0286
P78	273255	273592	Betaprime+rif	273407	FTL_0287 FTL_0288
P79	275588	275890	Betaprime+rif	275748	FTL_0290
P79	275588	275890	Sigma70	275783	FTL_0290
P80	276136	276445	Betaprime+rif	276327
P81	277817	278526	Betaprime+rif	278272	FTL_0292
P81	277817	278526	Sigma70	278281	FTL_0292
P82	278650	278968	Sigma70	278836	FTL_0293
P83	280493	280962	Sigma70	280852
P84	281261	281722	Betaprime+rif	281530	FTL_0294 FTL_0295
P84	281261	281722	Sigma70	281567	FTL_0294 FTL_0295
P85	286870	287213	Betaprime+rif	287013
P86	289226	289982	Betaprime+rif	289772
P86	289226	289982	Betaprime+rif	289449
P86	289226	289982	Sigma70	289367
P87	293010	293611	Betaprime+rif	293398	FTL_0306 FTL_R0011 FTL_R0012
P87	293010	293611	Sigma70	293412	FTL_0306 FTL_R0011 FTL_R0012
P88	293836	294243	Sigma70	294025	FTL_0307 FTL_0308
P89	303937	304274	Betaprime+rif	304151	FTL_0317
P89	303937	304274	Sigma70	304070	FTL_0317
P90	309054	309478	Sigma70	309201	FTL_0322
P91	311507	311930	Betaprime+rif	311706	FTL_0325 FTL_0326
P91	311507	311930	Sigma70	311747	FTL_0325 FTL_0326
P92	314556	315000	Betaprime+rif	314798	FTL_0330 FTL_0331
P92	314556	315000	Sigma70	314817	FTL_0330 FTL_0331
P93	317075	317373	Betaprime+rif	317231
P94	317981	318185	Betaprime+rif	318089	FTL_0335 FTL_0336
P95	326906	327232	Betaprime+rif	327074
P96	327605	328294	Sigma70	327965	FTL_0348
P97	329243	329555	Betaprime+rif	329372	FTL_0350
P98	332244	332626	Betaprime+rif	332397	FTL_0353 FTL_0354
P99	333648	333963	Sigma70	333757	FTL_0355 FTL_0356 FTL_0357
P100	334627	335239	Betaprime+rif	335041	FTL_0358
P100	334627	335239	Sigma70	334975	FTL_0358
P101	335822	336166	Betaprime+rif	335973	FTL_0359
P102	337625	337907	Betaprime+rif	337741	FTL_0361
P103	338555	338871	Betaprime+rif	338678	FTL_0363 FTL_0364 FTL_0365
P104	340454	340737	Betaprime+rif	340582	FTL_0366 FTL_0367
P105	344039	344466	Betaprime+rif	344331	FTL_0372
P105	344039	344466	Sigma70	344187	FTL_0372
P106	347953	348289	Betaprime+rif	348029	FTL_0375
P107	349520	349981	Betaprime+rif	349733	FTL_0377
P107	349520	349981	Sigma70	349790	FTL_0377
P108	350909	351323	Betaprime+rif	351103	FTL_0379 FTL_0380
P108	350909	351323	Sigma70	351169	FTL_0379 FTL_0380
P109	351997	352460	Betaprime+rif	352180
P109	351997	352460	Sigma70	352182
P110	353866	354129	Betaprime+rif	354065	FTL_0382 FTL_0383 FTL_0384
P110	353866	354129	Sigma70	354009	FTL_0382 FTL_0383 FTL_0384
P111	356709	357190	Betaprime+rif	356887	FTL_0387 FTL_0388
P111	356709	357190	Sigma70	356948	FTL_0387 FTL_0388
P112	361082	361408	Betaprime+rif	361297	FTL_0390 FTL_0391
P113	363273	363710	Betaprime+rif	363550	FTL_0394
P113	363273	363710	Sigma70	363519	FTL_0394
P114	371107	371862	Betaprime+rif	371642	FTL_0401 FTL_0402
P115	372055	372438	Betaprime+rif	372326	FTL_0403
P115	372055	372438	Sigma70	372286	FTL_0403
P116	373444	373808	Betaprime+rif	373607	FTL_0404 FTL_0405
P116	373444	373808	Sigma70	373592	FTL_0404 FTL_0405
P117	376975	377422	Betaprime+rif	377143
P117	376975	377422	Sigma70	377108
P118	377951	378382	Betaprime+rif	378146	FTL_0409 FTL_0410
P119	379664	380080	Betaprime+rif	379880	FTL_0411
P120	380735	381013	Betaprime+rif	380941	FTL_0412
P121	384138	384429	Betaprime+rif	384281	FTL_0415 FTL_0416
P122	388117	388989	Betaprime+rif	388736	FTL_0419 FTL_0421
P122	388117	388989	Sigma70	388699	FTL_0419 FTL_0421
P123	389176	390105	Betaprime+rif	389409	FTL_0422
P123	389176	390105	Sigma70	389748	FTL_0423
P124	390874	391244	Sigma70	391003	FTL_0425
P125	392276	392600	Betaprime+rif	392371
P126	399295	399709	Betaprime+rif	399552	FTL_0433 FTL_0434
P126	399295	399709	Sigma70	399552	FTL_0433 FTL_0434
P127	403194	403569	Betaprime+rif	403350	FTL_0436
P127	403194	403569	Sigma70	403321	FTL_0436
P128	404130	404663	Betaprime+rif	404369	FTL_0437 FTL_0438
P128	404130	404663	Sigma70	404416	FTL_0437 FTL_0438
P129	405387	405846	Betaprime+rif	405623
P129	405387	405846	Sigma70	405668
P130	406175	406588	Sigma70	406415	FTL_0439
P131	408035	408304	Betaprime+rif	408107	FTL_0440
P132	409033	409143	Betaprime+rif	409094	FTL_0441
P133	413904	414415	Betaprime+rif	414117	FTL_0444 FTL_R0014 FTL_R0015
P133	413904	414415	Sigma70	414130	FTL_0444 FTL_R0014 FTL_R0015
P134	415099	415753	Betaprime+rif	415359	FTL_0445 FTL_R0016
P134	415099	415753	Sigma70	415458	FTL_0445 FTL_R0016
P135	420580	420928	Betaprime+rif	420784
P136	421629	422090	Betaprime+rif	421809
P137	422642	423466	Betaprime+rif	423255	FTL_0447
P138	423778	424091	Betaprime+rif	423994	FTL_0448
P139	424195	425159	Betaprime+rif	424793	FTL_0449
P139	424195	425159	Sigma70	424810	FTL_0449
P140	425787	426467	Betaprime+rif	426228	FTL_0450 FTL_0451
P140	425787	426467	Sigma70	426255	FTL_0450 FTL_0451
P141	428094	428420	Betaprime+rif	428246	FTL_0453
P141	428094	428420	Sigma70	428316	FTL_0453
P142	431453	431609	Betaprime+rif	431503	FTL_0455
P143	432458	433395	Betaprime+rif	432708	FTL_0456 FTL_0457
P143	432458	433395	Betaprime+rif	433215	FTL_0458 FTL_0459
P143	432458	433395	Sigma70	432984	FTL_0457 FTL_0459
P144	435503	435906	Betaprime+rif	435771	FTL_0462
P144	435503	435906	Sigma70	435735	FTL_0462
P145	440295	440742	Betaprime+rif	440408	FTL_0465 FTL_0466
P146	441123	441431	Betaprime+rif	441239
P147	444057	444819	Betaprime+rif	444309	FTL_0469 FTL_0470
P147	444057	444819	Sigma70	444319	FTL_0469 FTL_0470
P148	445449	446071	Betaprime+rif	445889	FTL_0472
P148	445449	446071	Sigma70	445846	FTL_0472
P149	449969	450361	Sigma70	450230	FTL_R0053
P150	452646	453087	Betaprime+rif	452933	FTL_0476
P150	452646	453087	Sigma70	452900	FTL_0476
P151	454878	455277	Betaprime+rif	455137	FTL_0477
P151	454878	455277	Sigma70	455140	FTL_0477
P152	456750	457023	Betaprime+rif	456856
P153	465651	465994	Betaprime+rif	465884	FTL_0483 FTL_0484
P153	465651	465994	Sigma70	465821	FTL_0483 FTL_0484
P154	468010	468321	Betaprime+rif	468161
P155	470286	470632	Sigma70	470537	FTL_0487
P156	476005	476303	Betaprime+rif	476117
P157	476738	477130	Betaprime+rif	476946	FTL_0491
P157	476738	477130	Sigma70	476990	FTL_0491
P158	487820	488092	Betaprime+rif	487923
P159	491700	492121	Betaprime+rif	491893	FTL_0507 FTL_0508
P160	495347	495875	Betaprime+rif	495690
P161	500609	500985	Betaprime+rif	500751	FTL_0519
P162	501163	502480	Betaprime+rif	501816	FTL_0521 FTL_0522
P162	501163	502480	Betaprime+rif	502290	FTL_0523 FTL_0524
P162	501163	502480	Sigma70	501797	FTL_0520 FTL_0521 FTL_0522
P163	504508	504766	Betaprime+rif	504634
P164	504912	505309	Betaprime+rif	505119	FTL_0525
P164	504912	505309	Sigma70	505168	FTL_0525
P165	509463	509736	Betaprime+rif	509645
P166	513540	514058	Betaprime+rif	513832	FTL_0532 FTL_0533
P166	513540	514058	Sigma70	513848	FTL_0532 FTL_0533
P167	519935	520316	Betaprime+rif	520164	FTL_0536
P167	519935	520316	Sigma70	520201	FTL_0536
P168	521223	521582	Betaprime+rif	521394	FTL_0538
P169	526475	527228	Betaprime+rif	527162	FTL_R0021
P169	526475	527228	Sigma70	526815
P170	527756	528145	Betaprime+rif	527896	FTL_0544
P171	530765	531271	Betaprime+rif	531005	FTL_0547
P171	530765	531271	Sigma70	530980	FTL_0547
P172	533779	534507	Betaprime+rif	534132	FTL_0552
P172	533779	534507	Sigma70	534237	FTL_0552
P173	537123	537388	Betaprime+rif	537248	FTL_0556
P174	545702	545844	Betaprime+rif	545766	FTL_0563
P175	547977	548279	Betaprime+rif	548120	FTL_0568 FTL_0569
P176	549273	549672	Betaprime+rif	549485	FTL_0571
P176	549273	549672	Sigma70	549567	FTL_0571
P177	555730	556267	Betaprime+rif	555919	FTL_0578
P177	555730	556267	Sigma70	555975	FTL_0578
P178	557035	557504	Betaprime+rif	557276	FTL_0579
P178	557035	557504	Sigma70	557193	FTL_0579
P179	567043	567417	Betaprime+rif	567217	FTL_0585
P180	568798	569200	Betaprime+rif	568965	FTL_0586 FTL_0587
P180	568798	569200	Sigma70	569052	FTL_0586 FTL_0587 FTL_0588
P181	569294	569625	Betaprime+rif	569440	FTL_0588
P182	572271	572614	Betaprime+rif	572419	FTL_0590
P183	577204	577500	Betaprime+rif	577345	FTL_0591
P184	582222	582531	Betaprime+rif	582428	FTL_0596
P185	584638	585137	Betaprime+rif	584806	FTL_0598
P185	584638	585137	Sigma70	584965
P186	602424	602874	Betaprime+rif	602620	FTL_0610 FTL_0611 FTL_0612
P186	602424	602874	Sigma70	602604	FTL_0610 FTL_0611 FTL_0612
P187	605822	606242	Betaprime+rif	606019	FTL_0616
P187	605822	606242	Sigma70	605988	FTL_0616
P188	607365	608506	Betaprime+rif	608204	FTL_0617 FTL_0618
P188	607365	608506	Sigma70	608185	FTL_0617 FTL_0618
P189	609594	609944	Betaprime+rif	609765	FTL_0620
P190	612456	612767	Betaprime+rif	612596	FTL_0622 FTL_0623
P191	627803	628562	Betaprime+rif	628084	FTL_0644 FTL_0645
P191	627803	628562	Sigma70	628139	FTL_0644 FTL_0645
P192	629740	630075	Betaprime+rif	629929	FTL_0646
P193	632947	633483	Betaprime+rif	633232	FTL_0650
P193	632947	633483	Sigma70	633205	FTL_0650
P194	634322	634666	Betaprime+rif	634449	FTL_0651
P194	634322	634666	Sigma70	634463	FTL_0651
P195	636270	636968	Betaprime+rif	636770	FTL_R0023 FTL_0653 FTL_0654
P195	636270	636968	Sigma70	636657	FTL_R0023 FTL_0653
P196	637711	638083	Betaprime+rif	637917	FTL_0655
P197	641601	642079	Betaprime+rif	641792	FTL_0659 FTL_0660 FTL_0661
P197	641601	642079	Sigma70	641835	FTL_0659 FTL_0660 FTL_0661
P198	643616	643829	Betaprime+rif	643719	FTL_R0024 FTL_R0025 FTL_R0026
P199	644800	645288	Betaprime+rif	645027	FTL_0662 FTL_0663
P199	644800	645288	Sigma70	645078	FTL_0662 FTL_0663
P200	646343	646651	Betaprime+rif	646560	FTL_0664 FTL_0665
P201	662669	662925	Betaprime+rif	662827	FTL_0675 FTL_0676
P202	670861	671115	Betaprime+rif	671017
P203	676479	676838	Betaprime+rif	676641	FTL_0688 FTL_0689
P203	676479	676838	Sigma70	676699	FTL_0688 FTL_0689
P204	679133	679400	Betaprime+rif	679263	FTL_0690
P205	680643	681245	Betaprime+rif	680879	FTL_0691
P205	680643	681245	Sigma70	680870	FTL_0691
P206	685724	686043	Betaprime+rif	685889	FTL_0697
P206	685724	686043	Sigma70	685826	FTL_0697
P207	692180	692311	Betaprime+rif	692232	FTL_0702
P208	693493	693892	Sigma70	693659	FTL_0703 FTL_0704
P209	695409	695616	Betaprime+rif	695525	FTL_0705 FTL_0706
P210	698905	699342	Betaprime+rif	699186	FTL_0708 FTL_0709
P211	701519	701624	Betaprime+rif	701573	FTL_0710 FTL_0711
P212	709593	710002	Betaprime+rif	709778	FTL_0717 FTL_0718
P212	709593	710002	Sigma70	709724	FTL_0717 FTL_0718
P213	713541	713958	Betaprime+rif	713724	FTL_0722 FTL_0723
P214	714322	714805	Betaprime+rif	714530	FTL_0724 FTL_0725
P214	714322	714805	Sigma70	714531	FTL_0724 FTL_0725
P215	719211	719581	Betaprime+rif	719430	FTL_0730
P215	719211	719581	Sigma70	719403	FTL_0730
P216	721446	721871	Betaprime+rif	721663	FTL_0731 FTL_0732
P216	721446	721871	Sigma70	721618	FTL_0731 FTL_0732
P217	723649	723928	Sigma70	723830
P218	725841	726365	Betaprime+rif	725961
P219	728182	728507	Betaprime+rif	728321	FTL_0738
P220	729678	730021	Betaprime+rif	729910	FTL_0739 FTL_0740
P220	729678	730021	Sigma70	729889	FTL_0739 FTL_0740
P221	732693	732975	Betaprime+rif	732829	FTL_0742 FTL_0743
P222	733571	733862	Betaprime+rif	733714	FTL_0744
P223	736980	737203	Betaprime+rif	737105	FTL_0746
P224	738772	739030	Sigma70	738970	FTL_0748
P225	740183	740459	Betaprime+rif	740327	FTL_0749
P226	746614	746874	Betaprime+rif	746665	FTL_0753 FTL_0754
P227	747755	748087	Betaprime+rif	747854	FTL_0755
P228	749956	750386	Betaprime+rif	750276
P229	759643	759970	Sigma70	759784	FTL_0768
P230	761744	761963	Sigma70	761897	FTL_0770 FTL_0771
P231	771199	771579	Betaprime+rif	771355	FTL_0784
P231	771199	771579	Sigma70	771362	FTL_0784
P232	774605	774946	Sigma70	774775	FTL_0789
P233	776080	776348	Betaprime+rif	776159	FTL_0790
P234	777430	777732	Betaprime+rif	777605	FTL_0792
P235	780281	780625	Betaprime+rif	780456
P235	780281	780625	Sigma70	780457
P236	781458	781833	Betaprime+rif	781676	FTL_0795 FTL_0796
P236	781458	781833	Sigma70	781621	FTL_0795 FTL_0796
P237	784608	784978	Sigma70	784744
P238	786106	786477	Sigma70	786292	FTL_0801
P239	787864	788177	Betaprime+rif	788008
P240	788563	789075	Betaprime+rif	788766	FTL_0803 FTL_0804 FTL_0805
P240	788563	789075	Sigma70	788894	FTL_0803 FTL_0804 FTL_0805
P241	793173	793476	Betaprime+rif	793298	FTL_0806
P242	797804	798087	Betaprime+rif	797941
P243	801772	801877	Betaprime+rif	801826
P244	803218	803507	Betaprime+rif	803394	FTL_0819 FTL_0820
P245	805024	805558	Betaprime+rif	805380	FTL_0821 FTL_0822 FTL_0823
P245	805024	805558	Sigma70	805257	FTL_0821 FTL_0822 FTL_0823
P246	810079	810492	Betaprime+rif	810270	FTL_0828 FTL_0829
P246	810079	810492	Sigma70	810251	FTL_0828 FTL_0829
P247	811432	811725	Betaprime+rif	811592	FTL_0831
P248	811855	812006	Betaprime+rif	811927	FTL_0830 FTL_0831
P249	816003	816447	Betaprime+rif	816176
P250	817698	818032	Betaprime+rif	817815	FTL_0834
P251	818843	819219	Betaprime+rif	818974	FTL_0835 FTL_0836
P252	822586	822672	Betaprime+rif	822623	FTL_0839 FTL_0840
P253	823758	824089	Betaprime+rif	823948
P253	823758	824089	Sigma70	823923
P254	824191	824500	Sigma70	824422	FTL_0842 FTL_0843
P255	826433	826732	Betaprime+rif	826564	FTL_0844 FTL_0845
P256	827972	828736	Betaprime+rif	828216	FTL_0847
P256	827972	828736	Sigma70	828211	FTL_0847
P257	829411	829805	Betaprime+rif	829596
P257	829411	829805	Sigma70	829646
P258	831789	832261	Betaprime+rif	832072	FTL_0850 FTL_0851
P258	831789	832261	Sigma70	832038	FTL_0850
P259	838284	838755	Betaprime+rif	838447	FTL_0857
P259	838284	838755	Sigma70	838487	FTL_0857
P260	840328	840596	Betaprime+rif	840461	FTL_0860 FTL_0861
P261	843816	844277	Betaprime+rif	843946	FTL_0863 FTL_0864
P261	843816	844277	Sigma70	844078	FTL_0863 FTL_0864
P262	845449	845707	Sigma70	845561
P263	848017	848496	Betaprime+rif	848246
P263	848017	848496	Sigma70	848258
P264	849711	849967	Betaprime+rif	849855	FTL_0868 FTL_0869
P265	852180	852537	Betaprime+rif	852323	FTL_0873 FTL_0874 FTL_0875
P265	852180	852537	Sigma70	852425	FTL_0874 FTL_0875
P266	854110	854379	Betaprime+rif	854272	FTL_0877
P267	858850	859225	Sigma70	859124
P268	859966	860471	Betaprime+rif	860273	FTL_0881
P269	865474	865853	Sigma70	865654	FTL_0886 FTL_0887
P270	867910	868475	Betaprime+rif	868100	FTL_0891
P270	867910	868475	Sigma32	868150	FTL_0891
P271	873822	874312	Betaprime+rif	874039	FTL_0895 FTL_0896
P271	873822	874312	Sigma70	874029	FTL_0895 FTL_0896
P272	874814	875197	Betaprime+rif	874970
P273	876712	877045	Betaprime+rif	876930	FTL_0898 FTL_0899
P274	879712	880117	Betaprime+rif	879957	FTL_0901 FTL_0902 FTL_0903
P274	879712	880117	Sigma70	879993	FTL_0901 FTL_0902 FTL_0903
P275	883002	883304	Betaprime+rif	883193	FTL_0907 FTL_0908
P276	883778	884015	Betaprime+rif	883911
P277	886232	886573	Sigma70	886356	FTL_0913
P278	889492	889902	Betaprime+rif	889717
P278	889492	889902	Sigma70	889724
P279	890325	890615	Betaprime+rif	890456
P280	893617	894103	Betaprime+rif	893840	FTL_0918
P280	893617	894103	Sigma70	893897	FTL_0918
P281	894327	894821	Betaprime+rif	894511
P281	894327	894821	Sigma70	894514
P282	897377	897755	Betaprime+rif	897573	FTL_0923 FTL_0924 FTL_0925
P282	897377	897755	Sigma70	897637	FTL_0923 FTL_0924 FTL_0925
P283	898911	899234	Betaprime+rif	899088
P284	899539	899715	Betaprime+rif	899639	FTL_0926 FTL_0927
P285	904625	905192	Betaprime+rif	904811	FTL_0933
P285	904625	905192	Sigma70	904844	FTL_0933
P286	906805	906911	Betaprime+rif	906864
P287	907674	907987	Betaprime+rif	907886	FTL_0936 FTL_0937
P288	914343	914779	Betaprime+rif	914549	FTL_0944 FTL_0945 FTL_0946
P288	914343	914779	Sigma70	914617	FTL_0945 FTL_0946
P289	918322	918759	Betaprime+rif	918580	FTL_0948 FTL_0949
P289	918322	918759	Sigma70	918568	FTL_0948 FTL_0949
P290	919475	919801	Sigma70	919718	FTL_0950 FTL_0951
P291	922162	922538	Betaprime+rif	922407	FTL_0953
P292	926406	926765	Betaprime+rif	926575	FTL_0958
P292	926406	926765	Sigma70	926656	FTL_0958
P293	926971	927385	Betaprime+rif	927225
P293	926971	927385	Sigma70	927259
P294	928796	929153	Betaprime+rif	929034	FTL_0960
P294	928796	929153	Sigma70	929030	FTL_0960
P295	933672	933793	Betaprime+rif	933739	FTL_0965 FTL_0966
P296	935042	935299	Betaprime+rif	935134
P297	935402	935811	Betaprime+rif	935577	FTL_0967 FTL_0968
P297	935402	935811	Sigma70	935665	FTL_0967 FTL_0968
P298	936588	936775	Betaprime+rif	936683
P299	938074	938331	Betaprime+rif	938133	FTL_0969 FTL_0970
P300	957036	957402	Betaprime+rif	957195	FTL_0986
P301	958168	958623	Betaprime+rif	958397	FTL_0987 FTL_0988
P301	958168	958623	Sigma70	958410	FTL_0987 FTL_0988
P302	968693	968925	Betaprime+rif	968775	FTL_1004
P303	971144	971396	Betaprime+rif	971331	FTL_1006
P304	975201	975603	Betaprime+rif	975445	FTL_1014 FTL_1015
P304	975201	975603	Sigma70	975461	FTL_1014 FTL_1015
P305	976539	976866	Betaprime+rif	976697
P305	976539	976866	Sigma70	976715
P306	978629	978670	Betaprime+rif	978646	FTL_1018 FTL_1019 FTL_1020
P307	981343	981862	Betaprime+rif	981729	FTL_1022 FTL_1023
P308	982814	983187	Sigma70	982899	FTL_1024
P309	990028	990373	Betaprime+rif	990192
P310	990447	991297	Betaprime+rif	990992
P310	990447	991297	Sigma70	990912
P311	994162	994698	Betaprime+rif	994466	FTL_1037
P312	995666	996402	Betaprime+rif	995796	FTL_R0027
P312	995666	996402	Sigma70	995953	FTL_R0027 FTL_1039
P313	999429	999743	Betaprime+rif	999581	FTL_1042
P313	999429	999743	Sigma70	999565	FTL_1042
P314	1002573	1003058	Betaprime+rif	1002745	FTL_1046 FTL_1047 FTL_1048
P314	1002573	1003058	Sigma70	1002815	FTL_1046 FTL_1047 FTL_1048
P315	1007154	1007574	Betaprime+rif	1007334	FTL_1051
P315	1007154	1007574	Sigma70	1007430	FTL_1051
P316	1012040	1012542	Betaprime+rif	1012313	FTL_1057
P316	1012040	1012542	Sigma70	1012339	FTL_1057
P317	1014829	1015225	Betaprime+rif	1014990	FTL_1060 FTL_1061
P317	1014829	1015225	Sigma70	1015020	FTL_1060 FTL_1061
P318	1015535	1015843	Sigma70	1015772	FTL_1062
P319	1023193	1023632	Betaprime+rif	1023456	FTL_1071
P319	1023193	1023632	Sigma70	1023489	FTL_1071
P320	1028458	1028815	Betaprime+rif	1028580	FTL_1075 FTL_1076
P320	1028458	1028815	Sigma70	1028668	FTL_1075 FTL_1076
P321	1029272	1029586	Betaprime+rif	1029352	FTL_1077
P322	1031132	1031549	Betaprime+rif	1031338	FTL_1078
P322	1031132	1031549	Sigma70	1031353	FTL_1078
P323	1032443	1032784	Betaprime+rif	1032719	FTL_1080 FTL_1081
P324	1034071	1034514	Sigma70	1034217	FTL_1083
P325	1034833	1034953	Betaprime+rif	1034892	FTL_1084 FTL_1085 FTL_1086
P326	1036961	1037223	Betaprime+rif	1037036	FTL_1088
P327	1045153	1045455	Betaprime+rif	1045297	FTL_1096 FTL_1097
P328	1046624	1047075	Betaprime+rif	1046828	FTL_1099 FTL_1100 FTL_1101 FTL_1102
P328	1046624	1047075	Sigma70	1046721	FTL_1099 FTL_1101
P329	1049401	1049789	Betaprime+rif	1049611	FTL_1105 FTL_1106
P329	1049401	1049789	Sigma70	1049644	FTL_1105 FTL_1106
P330	1054981	1055372	Betaprime+rif	1055222	FTL_1109
P330	1054981	1055372	Sigma70	1055239	FTL_1109
P331	1055760	1056093	Betaprime+rif	1055815	FTL_1110
P332	1056654	1056999	Betaprime+rif	1056842
P332	1056654	1056999	Sigma70	1056895
P333	1058977	1059387	Betaprime+rif	1059197	FTL_1113
P333	1058977	1059387	Sigma70	1059219	FTL_1113
P334	1064670	1065179	Betaprime+rif	1064844	FTL_1118 FTL_1119
P334	1064670	1065179	Sigma70	1064910	FTL_1118 FTL_1119
P335	1066410	1066602	Betaprime+rif	1066493	FTL_1121
P336	1073245	1073692	Betaprime+rif	1073478	FTL_1127 FTL_1129
P336	1073245	1073692	Sigma70	1073421	FTL_1127 FTL_1129
P337	1073748	1074133	Betaprime+rif	1073959
P337	1073748	1074133	Sigma70	1073986
P338	1075900	1076240	Sigma70	1075982	FTL_1132
P339	1078333	1078671	Sigma70	1078521	FTL_1134 FTL_1135
P340	1081036	1081539	Betaprime+rif	1081323	FTL_1137 FTL_1138
P340	1081036	1081539	Sigma70	1081245	FTL_1137 FTL_1138
P341	1083900	1084370	Betaprime+rif	1084143	FTL_1141
P341	1083900	1084370	Sigma70	1084136	FTL_1141
P342	1085396	1086308	Betaprime+rif	1086006	FTL_1144 FTL_1145
P343	1096867	1097646	Betaprime+rif	1097482	FTL_1157
P343	1096867	1097646	Sigma70	1097207	FTL_1156 FTL_1157
P344	1102090	1102209	Betaprime+rif	1102147	FTL_1161
P345	1102855	1103367	Betaprime+rif	1103277
P346	1107339	1107725	Betaprime+rif	1107565
P347	1118774	1119376	Betaprime+rif	1118978	FTL_1172 FTL_R0028
P347	1118774	1119376	Sigma70	1119100	FTL_1172 FTL_R0028
P348	1125185	1125445	Betaprime+rif	1125390	FTL_1173
P349	1130161	1130645	Betaprime+rif	1130444	FTL_1177 FTL_1178 FTL_1179 FTL_1180
P349	1130161	1130645	Sigma70	1130403	FTL_1177 FTL_1178 FTL_1179 FTL_1180
P350	1130841	1131204	Betaprime+rif	1131026	FTL_1181
P351	1135688	1136149	Betaprime+rif	1135935	FTL_1187
P351	1135688	1136149	Sigma70	1135814	FTL_1186 FTL_1187
P352	1138030	1138512	Sigma70	1138323	FTL_1189 FTL_1190
P353	1138801	1139154	Betaprime+rif	1139011	FTL_1191
P354	1140868	1141224	Sigma70	1141112	FTL_1192
P355	1144699	1145043	Betaprime+rif	1144866	FTL_1197
P356	1148904	1149341	Betaprime+rif	1149079	FTL_1199 FTL_1200
P356	1148904	1149341	Sigma70	1149136	FTL_1199 FTL_1200
P357	1152140	1152528	Betaprime+rif	1152385	FTL_1202
P357	1152140	1152528	Sigma70	1152406	FTL_1202
P358	1155206	1155492	Betaprime+rif	1155344	FTL_1204
P359	1162324	1162649	Betaprime+rif	1162482	FTL_1212
P360	1166109	1166451	Sigma70	1166349	FTL_1216
P361	1167335	1168115	Betaprime+rif	1167860
P361	1167335	1168115	Sigma70	1167859
P362	1168767	1170095	Betaprime+rif	1169030	FTL_1218
P363	1170774	1171370	Betaprime+rif	1171078	FTL_1219 FTL_1220
P363	1170774	1171370	Sigma70	1171127	FTL_1219 FTL_1220
P364	1172401	1172931	Betaprime+rif	1172744	FTL_1221
P364	1172401	1172931	Sigma70	1172772	FTL_1221
P365	1173483	1173862	Sigma70	1173664
P366	1174864	1175256	Betaprime+rif	1175047	FTL_1225
P367	1179632	1180210	Betaprime+rif	1179971	FTL_1231 FTL_1232
P367	1179632	1180210	Sigma70	1179971	FTL_1231 FTL_1232
P368	1182618	1182951	Betaprime+rif	1182791	FTL_1234 FTL_1235
P369	1183722	1184246	Betaprime+rif	1184009	FTL_1236 FTL_1237
P369	1183722	1184246	Sigma70	1184021	FTL_1236 FTL_1237
P370	1185102	1185268	Betaprime+rif	1185157	FTL_1239
P371	1189489	1189905	Betaprime+rif	1189706	FTL_1243 FTL_1244
P371	1189489	1189905	Sigma70	1189580	FTL_1242 FTL_1243 FTL_1244
P372	1194208	1194481	Betaprime+rif	1194371	FTL_1250
P373	1198065	1198395	Betaprime+rif	1198176	FTL_1252 FTL_1253
P373	1198065	1198395	Sigma70	1198282	FTL_1252 FTL_1253
P374	1198796	1199128	Sigma70	1198928	FTL_1254 FTL_1255
P375	1199432	1199895	Betaprime+rif	1199556	FTL_1256
P375	1199432	1199895	Sigma70	1199775	FTL_1256
P376	1200235	1200704	Sigma70	1200398	FTL_1257
P377	1201019	1201309	Sigma70	1201095	FTL_1258
P378	1202679	1203115	Betaprime+rif	1202899
P379	1206992	1207870	Betaprime+rif	1207572	FTL_1263 FTL_1265
P379	1206992	1207870	Sigma70	1207297	FTL_1263 FTL_1264 FTL_1265
P379	1206992	1207870	Sigma32	1207599	FTL_1263 FTL_1265
P380	1208172	1208963	Betaprime+rif	1208514	FTL_1266
P380	1208172	1208963	Sigma70	1208578	FTL_1266
P381	1210977	1211325	Betaprime+rif	1211098
P382	1212650	1213009	Betaprime+rif	1212831	FTL_1271 FTL_1272
P382	1212650	1213009	Sigma70	1212800	FTL_1271 FTL_1272
P383	1219323	1219733	Betaprime+rif	1219640	FTL_1278 FTL_1279
P383	1219323	1219733	Sigma70	1219411	FTL_1278 FTL_1279
P384	1226398	1226804	Betaprime+rif	1226605	FTL_1285 FTL_1286
P385	1229137	1229762	Betaprime+rif	1229442	FTL_1288 FTL_R0033
P385	1229137	1229762	Sigma70	1229571	FTL_1288 FTL_R0033
P386	1232849	1233157	Betaprime+rif	1233019	FTL_1293
P386	1232849	1233157	Sigma70	1233091	FTL_1293
P387	1235703	1236012	Betaprime+rif	1235883	FTL_1296
P388	1237037	1237155	Betaprime+rif	1237096	FTL_1297 FTL_1298
P389	1238776	1239055	Betaprime+rif	1238927	FTL_1299 FTL_1300 FTL_1301
P390	1240354	1240746	Betaprime+rif	1240430	FTL_1303
P390	1240354	1240746	Sigma70	1240514	FTL_1303
P391	1242815	1243134	Betaprime+rif	1242960	FTL_1304
P392	1245143	1245463	Sigma70	1245336	FTL_1306
P393	1248122	1248507	Betaprime+rif	1248303	FTL_1309 FTL_1310
P393	1248122	1248507	Sigma70	1248269	FTL_1309 FTL_1310
P394	1249890	1250442	Betaprime+rif	1250223	FTL_1311 FTL_1312
P394	1249890	1250442	Sigma70	1250157	FTL_1311 FTL_1312
P395	1252765	1253136	Betaprime+rif	1252959	FTL_1314
P396	1253489	1253574	Betaprime+rif	1253543	FTL_1315 FTL_1316
P397	1254539	1256794	Betaprime+rif	1255586	FTL_1317 FTL_1318 FTL_1319
P397	1254539	1256794	Sigma70	1256224
P397	1254539	1256794	Sigma70	1255493	FTL_1317 FTL_1318 FTL_1319
P398	1265391	1265823	Betaprime+rif	1265555	FTL_1328
P398	1265391	1265823	Sigma70	1265533	FTL_1328
P399	1269893	1270304	Betaprime+rif	1270069	FTL_1334
P400	1270937	1271232	Betaprime+rif	1271100	FTL_1335
P401	1271526	1271833	Sigma70	1271591	FTL_1336
P402	1273221	1273523	Betaprime+rif	1273323	FTL_1337
P403	1281388	1282437	Betaprime+rif	1281615	FTL_1347 FTL_1348
P403	1281388	1282437	Sigma70	1282169
P404	1285350	1285696	Betaprime+rif	1285519	FTL_1350 FTL_1351
P405	1287450	1287794	Betaprime+rif	1287568
P405	1287450	1287794	Sigma70	1287633
P406	1290077	1290299	Betaprime+rif	1290176	FTL_1355 FTL_1356
P407	1292838	1293338	Betaprime+rif	1292958	FTL_1359 FTL_R0034
P407	1292838	1293338	Sigma70	1293101	FTL_1359 FTL_R0034
P408	1294193	1294879	Betaprime+rif	1294647	FTL_1361
P408	1294193	1294879	Sigma70	1294413	FTL_1360 FTL_1361
P409	1297800	1298396	Betaprime+rif	1298065	FTL_1364 FTL_1365
P409	1297800	1298396	Sigma70	1298053	FTL_1364 FTL_1365
P410	1305820	1306006	Betaprime+rif	1305932	FTL_1372 FTL_1373
P411	1307783	1308076	Betaprime+rif	1307970
P412	1312939	1313089	Betaprime+rif	1313000	FTL_1379 FTL_1380
P413	1313825	1314142	Betaprime+rif	1314009	FTL_1382
P414	1321407	1321706	Sigma70	1321617	FTL_1391
P415	1323044	1323403	Betaprime+rif	1323252	FTL_1392
P415	1323044	1323403	Sigma70	1323281	FTL_1392
P416	1323448	1323977	Betaprime+rif	1323704	FTL_1392 FTL_1393
P416	1323448	1323977	Sigma70	1323622	FTL_1392 FTL_1393
P417	1326400	1326790	Betaprime+rif	1326632	FTL_1395 FTL_1396
P418	1331580	1332088	Betaprime+rif	1331824	FTL_1402
P418	1331580	1332088	Sigma70	1331831	FTL_1402
P419	1333738	1334209	Sigma70	1333998	FTL_1406
P420	1335638	1336062	Betaprime+rif	1335897	FTL_1407 FTL_1408
P420	1335638	1336062	Sigma70	1335753	FTL_1407
P421	1338574	1338967	Betaprime+rif	1338714	FTL_1409 FTL_1410
P421	1338574	1338967	Sigma70	1338709	FTL_1409 FTL_1410
P422	1339711	1340165	Betaprime+rif	1339901	FTL_1411 FTL_1412
P422	1339711	1340165	Sigma32	1339900	FTL_1411 FTL_1412
P423	1342913	1343237	Betaprime+rif	1343053	FTL_1413
P423	1342913	1343237	Sigma70	1343128	FTL_1413
P424	1347807	1348197	Betaprime+rif	1348098	FTL_R0035 FTL_R0036 FTL_R0037 FTL_R0038 FTL_R0039
P424	1347807	1348197	Sigma70	1348006	FTL_R0035 FTL_R0036 FTL_R0037 FTL_R0038 FTL_R0039
P425	1349816	1350159	Betaprime+rif	1349940	FTL_1419 FTL_1420
P425	1349816	1350159	Sigma70	1349911	FTL_1419 FTL_1420
P426	1355710	1356692	Betaprime+rif	1356229	FTL_1425
P426	1355710	1356692	Sigma70	1356213	FTL_1425
P427	1368357	1368640	Betaprime+rif	1368495	FTL_1440 FTL_1441
P428	1370134	1370557	Betaprime+rif	1370336	FTL_1442 FTL_1443
P428	1370134	1370557	Sigma70	1370403	FTL_1442 FTL_1443
P429	1378394	1378759	Sigma70	1378466	FTL_1451
P430	1379364	1379902	Betaprime+rif	1379589	FTL_1452 FTL_1453 FTL_1454
P430	1379364	1379902	Sigma70	1379579	FTL_1452 FTL_1453 FTL_1454
P431	1384099	1384507	Betaprime+rif	1384251	FTL_1458 FTL_1459
P431	1384099	1384507	Sigma70	1384298	FTL_1458 FTL_1459
P432	1387595	1387822	Betaprime+rif	1387706	FTL_1462 FTL_1463
P433	1390453	1390829	Betaprime+rif	1390682	FTL_1464 FTL_1465 FTL_1466
P433	1390453	1390829	Sigma70	1390699	FTL_1464 FTL_1465 FTL_1466
P433	1390453	1390829	Sigma70	1390528	FTL_1464 FTL_1465 FTL_1466
P434	1391477	1391737	Betaprime+rif	1391583	FTL_1467
P435	1394365	1394741	Betaprime+rif	1394573	FTL_1468 FTL_1469 FTL_1470
P435	1394365	1394741	Sigma70	1394557	FTL_1468 FTL_1469 FTL_1470
P436	1395391	1395652	Betaprime+rif	1395488	FTL_1471
P437	1402494	1402814	Betaprime+rif	1402611	FTL_1476
P438	1404513	1404895	Betaprime+rif	1404668	FTL_1478
P438	1404513	1404895	Sigma70	1404639	FTL_1478
P439	1406044	1406551	Betaprime+rif	1406360	FTL_1479 FTL_1480
P439	1406044	1406551	Sigma70	1406293	FTL_1479 FTL_1480
P440	1411112	1411287	Sigma70	1411205	FTL_1485
P441	1411629	1411983	Betaprime+rif	1411775
P442	1412061	1412487	Sigma70	1412267
P443	1412783	1413144	Betaprime+rif	1413018	FTL_1486 FTL_1487
P444	1414125	1414636	Betaprime+rif	1414583	FTL_R0040
P444	1414125	1414636	Sigma70	1414382	FTL_R0040
P445	1417329	1417774	Betaprime+rif	1417534	FTL_1489 FTL_1490
P445	1417329	1417774	Sigma70	1417520	FTL_1489 FTL_1490
P446	1420437	1420739	Betaprime+rif	1420654	FTL_1492
P447	1421425	1421764	Betaprime+rif	1421581	FTL_1493
P448	1421851	1422189	Betaprime+rif	1422102
P449	1423765	1424082	Betaprime+rif	1423886	FTL_1494 FTL_1495
P450	1430683	1431467	Sigma70	1431036	FTL_1499
P451	1434137	1434418	Betaprime+rif	1434285	FTL_1503
P452	1436468	1437011	Betaprime+rif	1436679	FTL_1504
P452	1436468	1437011	Sigma70	1436632	FTL_1504
P453	1443044	1443450	Betaprime+rif	1443298	FTL_1511 FTL_1512
P453	1443044	1443450	Sigma70	1443222	FTL_1511 FTL_1512
P454	1443860	1444324	Betaprime+rif	1444115	FTL_1513
P454	1443860	1444324	Sigma70	1444118	FTL_1513
P455	1446226	1446511	Betaprime+rif	1446379	FTL_1516
P456	1449063	1449375	Betaprime+rif	1449205	FTL_1520
P456	1449063	1449375	Sigma70	1449191	FTL_1520
P457	1451605	1452179	Betaprime+rif	1451841	FTL_1521 FTL_1522
P457	1451605	1452179	Sigma70	1451797	FTL_1521 FTL_1522
P458	1457977	1458293	Betaprime+rif	1458167	FTL_1527
P458	1457977	1458293	Sigma70	1458106	FTL_1527
P459	1459358	1460300	Betaprime+rif	1459981
P459	1459358	1460300	Sigma70	1459931
P460	1462921	1463790	Betaprime+rif	1463553	FTL_1532 FTL_R0041 FTL_1533
P460	1462921	1463790	Sigma70	1463238	FTL_1532 FTL_R0041
P461	1464870	1465251	Betaprime+rif	1465048	FTL_1535
P461	1464870	1465251	Sigma70	1465011	FTL_1535
P462	1467572	1468144	Betaprime+rif	1467857	FTL_1537 FTL_1538
P462	1467572	1468144	Sigma70	1467808	FTL_1537 FTL_1538
P463	1472831	1473357	Betaprime+rif	1473052	FTL_1542 FTL_1543
P463	1472831	1473357	Sigma70	1473054	FTL_1542 FTL_1543
P464	1473778	1474052	Betaprime+rif	1473981	FTL_1544
P465	1476169	1476557	Betaprime+rif	1476387	FTL_1546
P465	1476169	1476557	Sigma70	1476396	FTL_1546
P466	1478635	1479152	Betaprime+rif	1478872	FTL_1547 FTL_1548
P466	1478635	1479152	Sigma70	1478883	FTL_1547 FTL_1548
P467	1481472	1481845	Betaprime+rif	1481605	FTL_1550
P468	1484319	1484742	Betaprime+rif	1484481	FTL_1552 FTL_1553
P468	1484319	1484742	Sigma70	1484578	FTL_1552 FTL_1553
P469	1486627	1486990	Betaprime+rif	1486786	FTL_1555
P469	1486627	1486990	Sigma70	1486773	FTL_1555
P470	1487765	1488378	Betaprime+rif	1488184
P471	1490250	1490592	Betaprime+rif	1490419	FTL_1558
P472	1500160	1500435	Betaprime+rif	1500303	FTL_1572
P473	1506552	1506968	Betaprime+rif	1506810	FTL_1579 FTL_1580
P473	1506552	1506968	Sigma70	1506821	FTL_1579 FTL_1580
P474	1509798	1510365	Betaprime+rif	1510092	FTL_1582 FTL_1583
P474	1509798	1510365	Sigma70	1510066	FTL_1582 FTL_1583
P475	1512054	1512372	Betaprime+rif	1512160
P476	1517747	1518061	Betaprime+rif	1517887	FTL_1589
P477	1518766	1519217	Betaprime+rif	1518999	FTL_1590
P477	1518766	1519217	Sigma70	1518919	FTL_1590
P478	1522210	1522560	Betaprime+rif	1522393	FTL_1594
P478	1522210	1522560	Sigma70	1522379	FTL_1594
P479	1526893	1527348	Betaprime+rif	1527114	FTL_1597 FTL_1598
P479	1526893	1527348	Sigma70	1527094	FTL_1597 FTL_1598
P480	1529172	1529881	Betaprime+rif	1529531	FTL_1599
P480	1529172	1529881	Sigma70	1529526	FTL_1599
P481	1532929	1533335	Betaprime+rif	1533165	FTL_1603
P481	1532929	1533335	Sigma70	1533087	FTL_1603
P482	1535096	1535561	Betaprime+rif	1535366	FTL_1606 FTL_1607 FTL_1608
P482	1535096	1535561	Sigma70	1535378	FTL_1606 FTL_1607 FTL_1608
P483	1536920	1537186	Betaprime+rif	1537030
P484	1539959	1540347	Betaprime+rif	1540140	FTL_1611 FTL_1612
P485	1542392	1542749	Betaprime+rif	1542580	FTL_1613
P486	1544463	1544757	Betaprime+rif	1544636	FTL_1615
P487	1546047	1546514	Betaprime+rif	1546359	FTL_1616 FTL_1617
P487	1546047	1546514	Sigma70	1546368	FTL_1616 FTL_1617
P488	1549866	1550231	Betaprime+rif	1550054	FTL_1620
P488	1549866	1550231	Sigma70	1550119	FTL_1620
P489	1553101	1553838	Sigma70	1553355	FTL_1622
P490	1554234	1554542	Betaprime+rif	1554407	FTL_1623 FTL_1624
P490	1554234	1554542	Sigma70	1554358	FTL_1623 FTL_1624
P491	1556430	1556727	Betaprime+rif	1556646	FTL_1626 FTL_1627
P492	1560942	1561205	Betaprime+rif	1561018	FTL_1630
P493	1569243	1569626	Sigma70	1569370	FTL_1637 FTL_1638
P494	1570064	1570690	Betaprime+rif	1570552
P495	1572118	1572403	Betaprime+rif	1572229
P496	1573302	1573389	Betaprime+rif	1573340	FTL_1642 FTL_1643
P497	1575675	1575957	Betaprime+rif	1575840	FTL_1644
P498	1577626	1578033	Betaprime+rif	1577813	FTL_1646 FTL_1647
P498	1577626	1578033	Sigma70	1577760	FTL_1646 FTL_1647
P499	1584291	1584578	Betaprime+rif	1584448	FTL_1655
P500	1586669	1586968	Betaprime+rif	1586757	FTL_1656
P501	1589042	1589422	Betaprime+rif	1589233	FTL_1658
P501	1589042	1589422	Sigma70	1589180	FTL_1658
P502	1599300	1599656	Betaprime+rif	1599439	FTL_1666
P502	1599300	1599656	Sigma70	1599443	FTL_1666
P503	1601663	1602047	Betaprime+rif	1601833
P503	1601663	1602047	Sigma70	1601828
P504	1602153	1602568	Sigma70	1602296	FTL_1668 FTL_1669
P505	1603246	1603720	Betaprime+rif	1603406	FTL_1670
P505	1603246	1603720	Sigma70	1603518	FTL_1670
P506	1603942	1604285	Sigma70	1604131	FTL_1671
P507	1608509	1608876	Betaprime+rif	1608716	FTL_1673
P508	1611370	1611998	Betaprime+rif	1611765	FTL_1676 FTL_1677
P508	1611370	1611998	Sigma70	1611714	FTL_1676 FTL_1677
P509	1612561	1613652	Betaprime+rif	1613266	FTL_1678
P509	1612561	1613652	Sigma70	1613255	FTL_1678
P510	1614522	1614756	Betaprime+rif	1614646	FTL_1680 FTL_1681
P511	1622483	1622867	Betaprime+rif	1622705	FTL_1689
P512	1623853	1624199	Betaprime+rif	1624007	FTL_1691 FTL_1692
P513	1624642	1625168	Betaprime+rif	1624954	FTL_1693
P514	1628285	1628692	Betaprime+rif	1628471	FTL_1698
P514	1628285	1628692	Sigma70	1628469	FTL_1698
P515	1631589	1631911	Sigma70	1631764	FTL_1700
P516	1635179	1635525	Betaprime+rif	1635309	FTL_1703
P517	1635858	1636297	Betaprime+rif	1636104	FTL_1704 FTL_1705
P517	1635858	1636297	Sigma70	1636106	FTL_1704 FTL_1705
P518	1639279	1639592	Betaprime+rif	1639491	FTL_1708
P519	1641633	1642161	Betaprime+rif	1641934	FTL_1709
P519	1641633	1642161	Sigma70	1641925	FTL_1709
P520	1642483	1643118	Betaprime+rif	1642746	FTL_1710 FTL_R0042
P520	1642483	1643118	Sigma70	1642893	FTL_1710 FTL_R0042
P521	1647343	1647677	Betaprime+rif	1647442	FTL_1714 FTL_1715 FTL_1716
P522	1648025	1648807	Betaprime+rif	1648289	FTL_1717
P522	1648025	1648807	Sigma70	1648331	FTL_1717
P523	1653859	1654694	Betaprime+rif	1654184	FTL_1722 FTL_1723
P523	1653859	1654694	Sigma70	1654164	FTL_1722 FTL_1723
P524	1657244	1657653	Betaprime+rif	1657465	FTL_1726
P524	1657244	1657653	Sigma70	1657494	FTL_1726
P525	1659818	1660215	Betaprime+rif	1659977	FTL_1727 FTL_1728
P526	1660974	1661599	Betaprime+rif	1661204	FTL_1729 FTL_1730
P526	1660974	1661599	Sigma70	1661207	FTL_1729 FTL_1730
P527	1665149	1665429	Betaprime+rif	1665289	FTL_1733
P528	1667085	1667474	Betaprime+rif	1667233	FTL_1735
P528	1667085	1667474	Sigma70	1667188	FTL_1735
P529	1668639	1669146	Betaprime+rif	1668889	FTL_1737 FTL_1738 FTL_1739
P529	1668639	1669146	Sigma70	1668881	FTL_1737 FTL_1738 FTL_1739
P530	1671372	1671920	Betaprime+rif	1671646	FTL_1740
P530	1671372	1671920	Sigma70	1671657	FTL_1740
P531	1682452	1682942	Betaprime+rif	1682676	FTL_1746
P531	1682452	1682942	Sigma70	1682647	FTL_1746
P532	1683713	1684013	Betaprime+rif	1683898	FTL_1748
P533	1684740	1685105	Betaprime+rif	1684847	FTL_1749 FTL_1750
P533	1684740	1685105	Sigma70	1684843	FTL_1749 FTL_1750
P534	1686470	1687063	Betaprime+rif	1686727	FTL_1751 FTL_R0046 FTL_R0047 FTL_R0048
P534	1686470	1687063	Sigma70	1686693	FTL_1751 FTL_R0046 FTL_R0047 FTL_R0048
P535	1689796	1690041	Betaprime+rif	1689932
P536	1691444	1691868	Sigma70	1691626	FTL_1756 FTL_1757
P537	1695541	1696001	Betaprime+rif	1695709	FTL_1760 FTL_1761 FTL_1762
P537	1695541	1696001	Sigma70	1695737	FTL_1760 FTL_1761 FTL_1762
P538	1700523	1701297	Betaprime+rif	1701004	FTL_1767 FTL_1768
P539	1706039	1706360	Betaprime+rif	1706141	FTL_1772
P539	1706039	1706360	Sigma70	1706147	FTL_1772
P540	1709317	1710126	Sigma70	1709569	FTL_1776 FTL_1777
P541	1710644	1711008	Betaprime+rif	1710933	FTL_1779
P541	1710644	1711008	Sigma70	1710793	FTL_R0049 FTL_1779
P542	1720795	1721337	Betaprime+rif	1721023	FTL_1787 FTL_1788 FTL_1789
P542	1720795	1721337	Sigma70	1721028	FTL_1787 FTL_1788 FTL_1789
P543	1724526	1724986	Betaprime+rif	1724732	FTL_1791 FTL_1792
P543	1724526	1724986	Sigma70	1724706	FTL_1791 FTL_1792
P544	1725544	1725948	Betaprime+rif	1725727
P545	1727118	1727569	Betaprime+rif	1727342
P545	1727118	1727569	Sigma70	1727370
P546	1727864	1728240	Betaprime+rif	1728086	FTL_1793
P547	1734629	1735476	Betaprime+rif	1735144	FTL_1801 FTL_1802 FTL_1803
P547	1734629	1735476	Sigma70	1734990	FTL_1801 FTL_1803
P548	1739080	1739282	Betaprime+rif	1739182
P549	1746069	1746857	Betaprime+rif	1746285	FTL_1811 FTL_R0050
P549	1746069	1746857	Sigma70	1746286	FTL_1811 FTL_R0050
P550	1764453	1764984	Betaprime+rif	1764676	FTL_1829 FTL_1830 FTL_1831
P550	1764453	1764984	Sigma70	1764669	FTL_1829 FTL_1830 FTL_1831
P551	1772672	1773227	Betaprime+rif	1773014	FTL_1838
P552	1777785	1778126	Betaprime+rif	1777961	FTL_1842 FTL_1843
P553	1786168	1786522	Betaprime+rif	1786354	FTL_1854
P554	1797681	1798256	Betaprime+rif	1798045	FTL_1866 FTL_1867
P554	1797681	1798256	Sigma70	1797982	FTL_1866 FTL_1867
P555	1800492	1801294	Betaprime+rif	1800772	FTL_1868 FTL_1869
P555	1800492	1801294	Sigma70	1800679	FTL_1868 FTL_1869
P556	1803375	1803649	Betaprime+rif	1803524	FTL_1871
P557	1804151	1804379	Betaprime+rif	1804250	FTL_1872
P558	1806654	1807062	Betaprime+rif	1806872	FTL_1874
P558	1806654	1807062	Sigma70	1806855	FTL_1874
P559	1818564	1818669	Betaprime+rif	1818616	FTL_1885
P560	1824005	1826120	Betaprime+rif	1825043	FTL_1892 FTL_1893 FTL_1894
P560	1824005	1826120	Sigma70	1825681
P560	1824005	1826120	Sigma70	1824795	FTL_1893
P561	1826212	1826579	Betaprime+rif	1826456	FTL_1895
P562	1828347	1828726	Betaprime+rif	1828574	FTL_1897 FTL_1898
P563	1830616	1831154	Sigma70	1830851	FTL_1900
P564	1832111	1832524	Betaprime+rif	1832311	FTL_1901
P565	1833077	1833445	Betaprime+rif	1833325	FTL_1902
P566	1835801	1836256	Sigma70	1836017	FTL_1903
P567	1842215	1842653	Betaprime+rif	1842397	FTL_1908
P567	1842215	1842653	Sigma70	1842377	FTL_1908
P568	1844083	1844781	Betaprime+rif	1844204	FTL_1910 FTL_1912
P568	1844083	1844781	Sigma70	1844547	FTL_1911 FTL_1912
P569	1846749	1847289	Betaprime+rif	1847003	FTL_1914
P569	1846749	1847289	Sigma70	1847052	FTL_1914
P570	1848731	1849098	Betaprime+rif	1848921	FTL_1915
P571	1849202	1849656	Betaprime+rif	1849485
P571	1849202	1849656	Sigma70	1849494
P572	1850897	1851207	Betaprime+rif	1851000	FTL_1916 FTL_1917
P573	1851375	1851715	Betaprime+rif	1851539	FTL_1918
P574	1852022	1852630	Sigma70	1852245
P575	1856665	1857100	Betaprime+rif	1856870	FTL_1923
P575	1856665	1857100	Sigma70	1856873	FTL_1923
P576	1861402	1861879	Betaprime+rif	1861617	FTL_1929 FTL_1930
P576	1861402	1861879	Sigma70	1861743	FTL_1929 FTL_1930
P577	1867981	1868322	Sigma70	1868173	FTL_1938
P578	1876657	1877043	Betaprime+rif	1876879	FTL_1947 FTL_1948
P578	1876657	1877043	Sigma70	1876734	FTL_1947 FTL_1948
P579	1878520	1879367	Betaprime+rif	1878738	FTL_1949 FTL_1950
P579	1878520	1879367	Sigma70	1878802	FTL_1949 FTL_1950
P580	1879915	1882738	Betaprime+rif	1880335	FTL_1951 FTL_1952
P580	1879915	1882738	Sigma70	1880676	FTL_1952 FTL_1953
P581	1882925	1895369	Betaprime+rif	1893776	FTL_1966 FTL_1967
P581	1882925	1895369	Sigma70	1893241
P581	1882925	1895369	Sigma70	1894292	FTL_1967 FTL_R0051 FTL_R0052
